# Supplementary material
Source: PubMed Central journal article supplement (PMC3285348)
Supplement: supp_M111.308627_jbc.M111.308627-2.pdf [file supp_M111.308627_jbc.M111.308627-2.pdf]

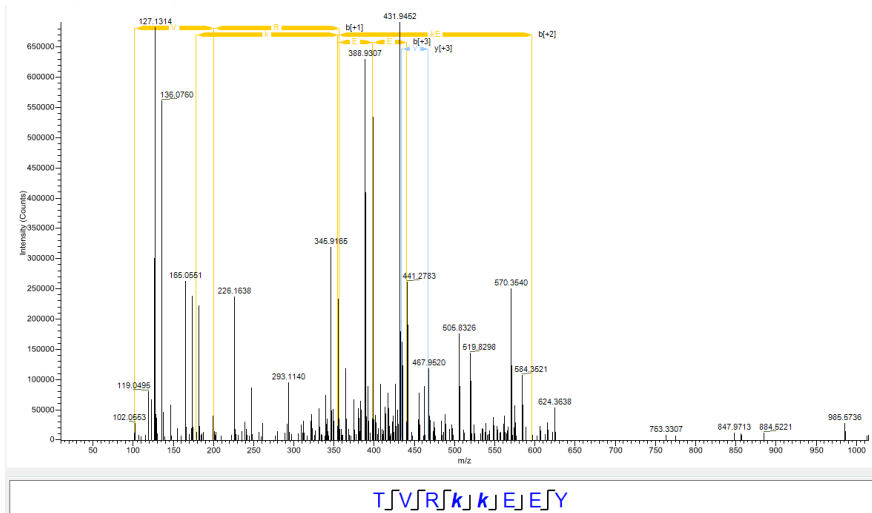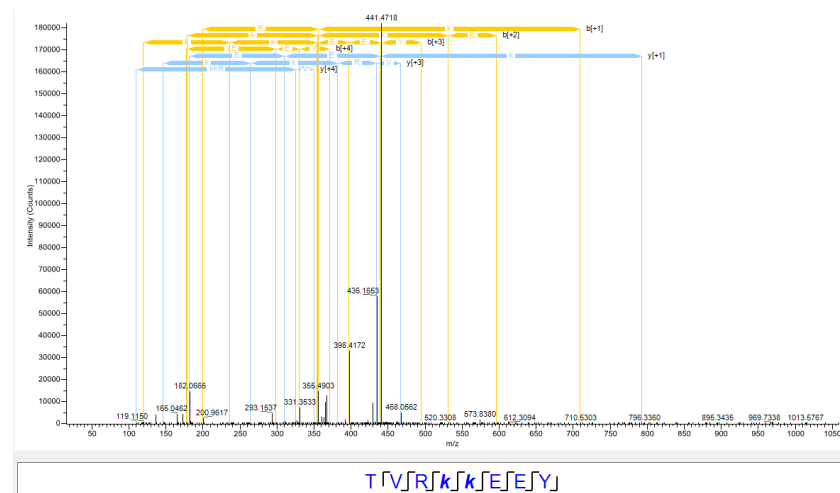

Figure S2. Annotated HCD and CID spectra of TMT labeled peptide Thr1964-Tyr1971 (ID = 1, see Table S1 and Fig. 1), which exhibited the highest TMT-127/TMT-126 ratio.
