# Supplementary material
Source: PubMed Central journal article supplement (PMC3285348)
Supplement: supp_M111.308627_jbc.M111.308627-3.pdf [file supp_M111.308627_jbc.M111.308627-3.pdf]

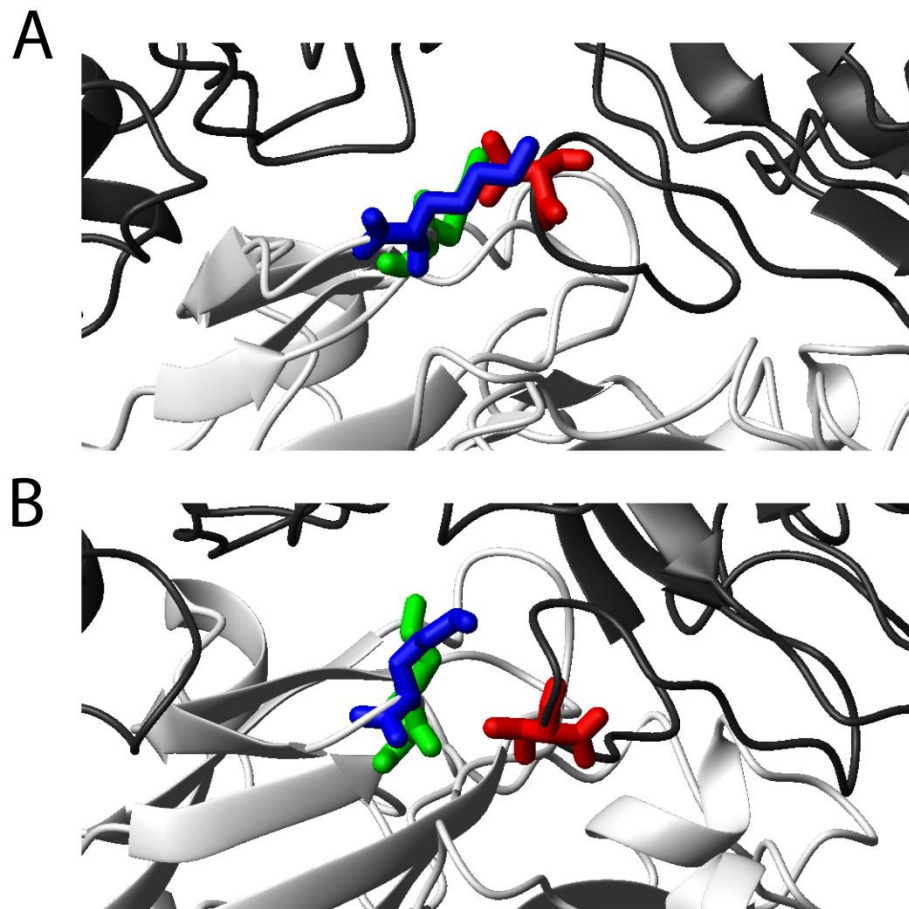

Figure S3. Positioning of Lys1967 (green) and Lys1968 (red) in a zoomed-in section of the crystal structure of FVIII as reported by (A) Shen *et al.* and (B) Ngo *et al.* (27,26). Val 663 of the A2 domain is displayed in red. The A3 domain of the FVIII light chain is shown as a grey ribbon. The heavy chain including the A1 domain and the A2 domain is displayed as a black ribbon.
