# Supplementary material
Source: PubMed Central journal article supplement (PMC3285348)
Supplement: supp_M111.308627_jbc.M111.308627-4.pdf [file supp_M111.308627_jbc.M111.308627-4.pdf]

| ID   | Identified Peptide (ID) | Modified lysine residue | Total number of times identified | Average retention time | Best Scoring CID spectrum |            |              |           | Best Scoring HCD spectrum |            |              |           |
|------|-------------------------|-------------------------|----------------------------------|------------------------|---------------------------|------------|--------------|-----------|---------------------------|------------|--------------|-----------|
|      |                         |                         |                                  |                        | Charge                    | MH+ (Da)   | DeltaM (ppm) | Max Xcorr | Charge                    | MH+ (Da)   | DeltaM (ppm) | Max Xcorr |
| 1    | TVRkkEEY                | 1967+1968               | 9                                | 25.3 ± 0.7             | 4                         | 1502.881   | -2.4         | 1.25      | 4                         | 1502.892   | 4.7          | 1.61      |
| 2.1  | GkksSPLTESGGPL          | 924+925                 | 10                               | 31.8 ± 0.9             | 3                         | 1808.04233 | -0.87        | 2.53      | 3                         | 1808.05112 | 3.99         | 4.14      |
| 2.2  | GkksSPL                 | 924+925                 | 10                               | 27.7 ± 0.7             | 3                         | 1166.74005 | -1.51        | 1.07      | 3                         | 1166.7417  | -0.1         | 1.37      |
| 3    | SLSEENNDskLL            | 946                     | 8                                | 35.7 ± 0.4             | 2                         | 1573.81279 | -1.37        | 2.91      | 2                         | 1573.8145  | -0.29        | 1.3       |
| 4    | LSEkNkVVVGkGEF          | 1147+1149+1154          | 8                                | 33.2 ± 0.5             | 4                         | 2209.32949 | -0.73        | 3.01      | 4                         | 2209.33022 | -0.4         | 3.74      |
| 5.1  | SLSDLQEAkY              | 812                     | 14                               | 35.9 ± 0.6             | 2                         | 1378.736   | 4.9          | 2.48      | 2                         | 1378.730   | 0.4          | 1.28      |
| 5.2  | SDLQEAkY                | 812                     | 5                                | 30.9 ± 0.7             | 2                         | 1178.61821 | 4.16         | 2.09      | 2                         | 1178.6126  | -0.61        | 0.82      |
| 6    | TkDNALF                 | 986                     | 8                                | 36.6 ± 0.4             | 2                         | 1033.575   | -0.6         | 1.59      | 2                         | 1033.575   | -0.8         | 1.30      |
| 7    | AVFDEGkSW               | 206                     | 9                                | 38.7 ± 0.6             | 2                         | 1263.64372 | -0.99        | 2.56      | 2                         | 1263.64372 | -0.99        | 1.46      |
| 8    | RLNEkLGTTAAATEL         | 862                     | 8                                | 33.3 ± 0.5             | 3                         | 1741.98465 | -2.41        | 1.76      | 3                         | 1741.98465 | -2.41        | 2.94      |
| 9    | MkNLF                   | 1225                    | 8                                | 38.6 ± 0.4             | 2                         | 877.50469  | 0.14         | 1.37      | 2                         | 877.50377  | -0.9         | 0.88      |
| 10   | VkPNETkTY               | 1808+1813               | 10                               | 27.1 ± 0.7             | 3                         | 1529.8913  | 4.22         | 2.6       | 3                         | 1529.88105 | -2.48        | 1.91      |
| 11   | kVQHhMAPTkDEF           | 1818+1827               | 11                               | 27.7 ± 0.6             | 4                         | 2018.07534 | -2.46        | 2.42      | 4                         | 2018.07802 | -1.13        | 3.51      |
| 12   | kkTLF                   | 47+48                   | 6                                | 34.1 ± 0.6             | 3                         | 1086.72498 | 4.93         | 0.67      | 3                         | 1086.71848 | -1.05        | 0.92      |
| 13   | NIAkPRPPWMGL            | 63                      | 8                                | 39.7 ± 0.4             | 3                         | 1604.91501 | -1.58        | 2.43      | 3                         | 1604.91501 | -1.58        | 2.59      |
| 14   | AkEktQTL                | 168+188                 | 6                                | 27.0 ± 1.0             | 3                         | 1368.83631 | -0.64        | 1.21      | 3                         | 1368.84272 | 4.05         | 1.61      |
| 15.1 | FTIFDEtkSW              | 1887                    | 8                                | 46.5 ± 0.3             | 2                         | 1498.76409 | -1.15        | 2.29      | 2                         | 1498.76384 | -1.32        | 1.19      |
| 15.2 | TIFDEtkSW               | 1887                    | 8                                | 42.4 ± 0.4             | 2                         | 1351.70354 | 4.55         | 2.69      | 2                         | 1351.69438 | -2.23        | 0.96      |
| 16   | QVLkENGMASDPL           | 142                     | 5                                | 36.6 ± 0.7             | 2                         | 1723.91973 | 3.95         | 2.99      | 2                         | 1723.91106 | -1.08        | 1.2       |
| 17.1 | EEDQRQGAEPkRkNF         | 1804                    | 11                               | 26.5 ± 0.7             | 4                         | 1928.96352 | -1.03        | 1.43      | 3                         | 1928.97416 | 4.48         | 2.46      |
| 17.2 | SSLISYEEDQRQGAEPkRkNF   | 1804                    | 8                                | 35.7 ± 0.4             | 2                         | 1573.81279 | -1.37        | 2.91      | 2                         | 1573.8145  | -0.29        | 1.3       |
| 18   | ETVEMLPskAGIW           | 1992                    | 10                               | 45.6 ± 0.4             | 2                         | 1685.90911 | 4.63         | 2.67      | 2                         | 1685.90911 | 4.63         | 1.41      |
| 19.1 | FGNVdSSGikHNIFNPPiIARY  | 2136                    | 5                                | 40.7 ± 0.1             | 4                         | 2684.433   | -2.21        | 4.07      | 4                         | 2684.4313  | -2.85        | 3.25      |
| 19.2 | FGNVdSSGikHNIF          | 2136                    | 5                                | 37.6 ± 0.1             | 3                         | 1759.91983 | -0.53        | 3.12      | 3                         | 1759.91892 | -1.05        | 1.67      |
| 20   | SDVDLEkDVHSGLIGPL       | 1845                    | 7                                | 41.5 ± 0.4             | 3                         | 2019.09427 | 5.14         | 3.15      | 3                         | 2019.09427 | 5.14         | 3.25      |
| 21.1 | GMESkAISDAQITASSY       | 2183                    | 9                                | 38.0 ± 0.3             | 2                         | 1983.97539 | -1           | 3.38      | 2                         | 1983.9865  | 4.6          | 1.83      |
| 21.2 | GMESkAISDAQITASSYF      | 2183                    | 9                                | 43.9 ± 0.3             | 3                         | 2131.04166 | -1.94        | 3.35      | 2                         | 2131.05425 | 3.97         | 1.71      |
| 22   | GQWAPkLARL              | 2049                    | 10                               | 36.4 ± 0.4             | 3                         | 1364.82364 | -0.47        | 2.21      | 3                         | 1364.82364 | -0.47        | 1.87      |
| 23   | FQNGkVkvF               | 2279+2281               | 6                                | 34.5 ± 0.5             | 3                         | 1516.91379 | -1.53        | 1.69      | 3                         | 1516.91379 | -1.53        | 1.95      |
| 24   | SLDGkkW                 | 2110+2111               | 8                                | 33.3 ± 0.5             | 3                         | 1283.76825 | 3.87         | 1.91      | 3                         | 1283.76267 | -0.48        | 1.33      |
| 25.1 | NNGPQRIGRkY             | 422                     | 8                                | 24.7 ± 0.7             | 3                         | 1527.86487 | 4.22         | 2.07      | 3                         | 1527.86487 | 4.22         | 1.37      |
| 25.2 | LNNGPQRIGRkY            | 422                     | 15                               | 25.7 ± 0.7             | 3                         | 1640.9379  | -2.8         | 2.5       | 3                         | 1640.93973 | -1.68        | 2.55      |
| 26   | kESVDQRGNQIMSDkRNVILF   | 556+570                 | 14                               | 37.2 ± 1.0             | 5                         | 2927.60389 | -0.28        | 2.88      | 5                         | 2927.60053 | -1.43        | 4.92      |
| 27   | STkEPF                  | 2065                    | 8                                | 31.0 ± 0.5             | 2                         | 933.51201  | -0.14        | 1.69      | 2                         | 933.51085  | -1.39        | 0.92      |
| 28   | SRRLPkGVkHL             | 493+496                 | 13                               | 25.8 ± 2               | 4                         | 1741.1205  | -1.68        | 1.74      | 5                         | 1741.12058 | -1.63        | 3.19      |
| 29   | RPQVNNPkEW              | 2227                    | 7                                | 30.9 ± 0.6             | 3                         | 1492.81601 | 3.97         | 1.66      | 3                         | 1492.81601 | 3.97         | 2.7       |

Table S1. Identified peptides that were obtained employing the workflow shown in figure S1 on plasma-derived FVIII. The non-capitalized letter k within a peptide sequence indicates that this residue was modified with a TMT label. The CID and HCD spectra of the peptide Thr1964-Tyr1971 (TVRkkEEY) are shown in figure S2.
