# Supplementary material
Source: PubMed Central journal article supplement (PMC3285348)
Supplement: supp_M111.308627_jbc.M111.308627-5.pdf [file supp_M111.308627_jbc.M111.308627-5.pdf]

|            | Relative specific<br>two-stage chromogenic<br>activity | Relative specific<br>one-stage clotting<br>activity |
|------------|--------------------------------------------------------|-----------------------------------------------------|
| FVIII WT   | 1.0                                                    | 1.0                                                 |
| Lys1967Ile | 0.7                                                    | 0.7                                                 |
| Lys1967Ala | 0.9                                                    | 1.1                                                 |
| Lys1968Ala | 1.2                                                    | 1.9                                                 |

Table S2. Specific two-stage and one-stage activities of the FVIII variants relative to FVIII WT. The FVIII antigen concentration and two-stage chromogenic activity were assessed as described in van den Biggelaar *et al.* (33) with the exception that anti-heavy chain antibody CLB-CAg9 was employed to assess the antigen concentration instead of CLB-CAg12. In the one-stage clotting assay, FVIII WT and variants thereof were reconstituted in FVIII deficient plasma (Siemens Healthcare Diagnostics, Marburg, Germany). The clotting time was assessed on a Sysmex CA-1500 Coagulation Analyzer (Sysmex Corporation, Kobe, Japan) employing Actin-FSL (Siemens Healthcare Diagnostics, Marburg, Germany). Specific activities were obtained by dividing the results of the one-stage and two-stage assays with the antigen concentration.
